# Supplementary material
Source: MDPI journal article supplement (doi:10.3390/app16115376)
Supplement: s1 [file applsci-4301122-supplementary.pdf › applsci-4301122-supplementary.pdf]

Supplementary Materials

# Chemical and Sensory Evaluation of Commercial Oat Beverages with Emphasis on Their Lipid Fraction

Joanna Bryś <sup>1,\*</sup>, Katarzyna Zielińska <sup>2</sup>, Marta Siol <sup>1</sup>, Diana Mańko-Jurkowska <sup>1</sup> and Bartłomiej Zieniuk <sup>1</sup>

<sup>1</sup> Department of Chemistry, Institute of Food Sciences, Warsaw University of Life Sciences-SGGW, 159C Nowoursynowska Str., 02-776 Warsaw, Poland; marta\_siol@sggw.edu.pl (M.S.), diana\_manko-jurkowska@sggw.edu.pl (D.M.J.), bartlomiej\_zieniuk@sggw.edu.pl (B.Z.)

<sup>2</sup> Faculty of Food Technology, Warsaw University of Life Sciences-SGGW, 159C Nowoursynowska Str., 02-776 Warsaw, Poland; zielinskakx@gmail.com (K.Z.)

\* Correspondence: joanna\_brys@sggw.edu.pl (J.B.)

**Table S1.** Manufacturer-declared ingredient lists.

| Sample code | Declared ingredients                                                                                                                                                                                            |
|-------------|-----------------------------------------------------------------------------------------------------------------------------------------------------------------------------------------------------------------|
| L1          | Water, oat (13%), sunflower oil, salt, vitamins D and B12, calcium                                                                                                                                              |
| L2          | Water, oat 10%, sunflower oil, calcium carbonate, sea salt, vitamin E, vitamin B6, vitamin B2, vitamin A, folic acid, vitamin D, vitamin B12                                                                    |
| L3          | Water, oat* (16%), sunflower oil*. *Organic ingredients                                                                                                                                                         |
| L4          | Oat base [water, oat (8.7%)], sunflower oil, chicory root fiber, pea protein, acidity regulator: potassium phosphates; sea salt, vitamins: B6, B12, D, E                                                        |
| L5          | Oat base (97.3%) (water, oat (10.5%)), corn fiber, sunflower oil, calcium, sea salt, stabilizer (gellan gum), vitamins (B2, B12, D2)                                                                            |
| P1          | 100% gluten-free oat flour                                                                                                                                                                                      |
| P2          | 100% organic oat drink powder                                                                                                                                                                                   |
| P3          | Coconut fat, gluten-free oat flour 21%, glucose syrup powder, dextrose, maltodextrin, inulin, emulsifier: E472e (plant origin), stabilizer: potassium phosphate, anti-caking agent: silicon dioxide, table salt |
| P4          | 99.75% wholegrain oat flour*, 0.25% $\alpha$ -amylase. *Organic farming. Naturally contains sugar                                                                                                               |
| P5          | Instant oat flakes* (50%), corn maltodextrin*, high-oleic sunflower oil*, tricalcium citrate, calcareous algae ( <i>Lithothamnium calcareum</i> ), natural vanilla flavor* (*organic ingredients)               |

Source: manufacturer declarations

Table S2. Manufacturer-declared nutritional values.

| Sample code | Basis as reported              | Energy               | Fat (g) | Saturated fat (g) | Carbohy- drates (g) | Sugars (g) | Fiber (g) | Protein (g) | Salt (g) | Other declared components                                                     |
|-------------|--------------------------------|----------------------|---------|-------------------|---------------------|------------|-----------|-------------|----------|-------------------------------------------------------------------------------|
| L1          | Per 100 mL                     | 234 kJ / 56 kcal     | 3.00    | 0.40              | 6.30                | 3.50       | 0.70      | 0.70        | 0.10     | Vitamin D 0.75 µg; vitamin B12 0.375 µg; cal- cium 120 mg                     |
| L2          | Per 100 mL                     | 234 kJ / 56 kcal     | 2.40    | 0.20              | 7.70                | 3.20       | 0.30      | 0.70        | 0.08     | Calcium 120 mg; vitamin B2 0.21 mg; vitamin D 1.10 µg; vitamin B12 0.38 µg    |
| L3          | Per 100 mL                     | 232 kJ / 55 kcal     | 1.20    | 0.20              | 9.60                | 5.70       | n.d.      | 1.10        | 0.04     | —                                                                             |
| L4          | Per 100 mL                     | 247 kJ / 59 kcal     | 3.00    | 0.30              | 6.70                | 3.30       | 1.00      | 0.80        | 0.12     | Vitamin D 0.38 µg; vitamin E 0.90 mg; vitamin B6 0.11 mg; vitamin B12 0.19 µg |
| L5          | Per 100 mL                     | 192 kJ / 46 kcal     | 1.50    | 0.20              | 6.60                | 3.30       | 1.40      | 0.80        | 0.08     | Vitamin D2 0.75 µg; vitamin B2 0.21 mg; vitamin B12 0.38 µg; calcium 120 mg   |
| P1          | Per 100 mL (20 g), as reported | 344 kJ / 81 kcal     | 1.20    | 0.20              | 18.20               | 4.20       | 0.40      | 1.20        | 0.06     | —                                                                             |
| P2          | Per 100 mL (20 g), as reported | 339 kJ / 80 kcal     | 0.96    | 0.23              | 16.40               | 2.60       | 0.12      | 1.30        | 0.05     | —                                                                             |
| P3          | Per 100 mL (20 g), as reported | 393.2 kJ / 93.8 kcal | 4.40    | 3.80              | 12.60               | 4.80       | 0.78      | 0.58        | 0.10     | —                                                                             |
| P4          | Per 100 mL (20 g), as reported | 339 kJ / 80 kcal     | 0.80    | 0.20              | 16.60               | 2.60       | n.d.      | 1.20        | 0.00     | —                                                                             |
| P5          | Per 100 mL (20 g), as reported | 355 kJ / 84.8 kcal   | 1.84    | 0.20              | 15.84               | 4.86       | n.d.      | 0.90        | 0.04     | —                                                                             |

Source: manufacturer declarations; n.d., not declared by the manufacturer

**Table S3.** Spearman's rank correlation coefficients between selected lipid-related parameters and sensory attributes of the analyzed oat-based products. 5

| <b>Lipid-related parameter</b> | <b>Overall desirability</b> | <b>Odor</b> | <b>Appearance</b> | <b>Color</b> | <b>Texture</b> | <b>Taste</b> |
|--------------------------------|-----------------------------|-------------|-------------------|--------------|----------------|--------------|
| Extraction yield               | 0.273                       | 0.188       | 0.358             | 0.442        | 0.085          | 0.236        |
| SFA                            | -0.442                      | -0.382      | -0.576            | -0.370       | -0.523         | -0.467       |
| MUFA                           | 0.055                       | -0.067      | 0.224             | 0.030        | 0.188          | 0.103        |
| PUFA                           | 0.212                       | 0.261       | -0.139            | -0.188       | 0.419          | 0.273        |
| $\tau_{\max}$                  | 0.164                       | 0.261       | 0.564             | 0.624        | -0.085         | 0.055        |
| Tp1                            | -0.442                      | -0.442      | -0.648*           | -0.673*      | -0.243         | -0.382       |
| Tp2                            | -0.321                      | -0.273      | 0.042             | 0.103        | -0.511         | -0.406       |

Values are Spearman's rank correlation coefficients ( $\rho$ ). Statistically significant correlations are shown in bold and marked with \* ( $p < 0.05$ ).

6

7
